1

2

3

## **Bait-ER: a Bayesian method to detect targets of selection in Evolve-and-Resequencing experiments**

4

Carolina Barata<sup>1,†</sup>, Rui Borges<sup>2,†</sup> and Carolin Kosiol<sup>1,2,\*</sup>

5

1. Centre for Biological Diversity, University of St Andrews, St Andrews, Fife KY16 9TH, UK 2.

6

Institute of Population Genetics, Vetmeduni Vienna, Veterinärplatz 1, 1210 Wien, Austria

7

† These authors contributed equally and will be putting their name first on the citation in their CVs.

8

\* Corresponding author: ck202@st-andrews.ac.uk

# Bait-ER: a Bayesian method to detect targets of selection in Evolve-and-Resequencing experiments

## Abstract

For over a decade, experimental evolution has been combined with high-throughput sequencing techniques in so-called Evolve-and-Resequencing (E&R) experiments. This allows testing for selection in populations kept in the laboratory under given experimental conditions. However, identifying signatures of adaptation in E&R datasets is far from trivial, and it is still necessary to develop more efficient and statistically sound methods for detecting selection in genome-wide data. Here, we present Bait-ER – a fully Bayesian approach based on the Moran model of allele evolution to estimate selection coefficients from E&R experiments. The model has overlapping generations, a feature that describes several experimental designs found in the literature. We tested our method under several different demographic and experimental conditions to assess its accuracy and precision, and it performs well in most scenarios. However, some care must be taken when analysing specific allele trajectories, particularly those where drift largely dominates and starting frequencies are low. We compare our method with other available software and report that ours has generally high accuracy even for very difficult trajectories. Furthermore, our approach avoids the computational burden of simulating an empirical null distribution, outperforming available software in terms of computational time and facilitating its use on genome-wide data.

We implemented and released our method in a new open-source software package that can be accessed at <https://github.com/mrborges23/Bait-ER>.

**Key-words:** targets of selection, E&R, pool-seq, selection coefficients, Moran model, Bayesian inference

## 30 **1 Introduction**

31 Natural selection is a very complex process that can dramatically alter phenotypes and genotypes over  
32 remarkably short timescales. Researchers have successfully tested theoretical predictions and collected  
33 evidence for how strong laboratory selection acting on phenotypes can be. However, it is not as  
34 straightforward to measure selection acting on the genome. There are many confounding factors that  
35 can lead to spurious results. This is particularly relevant if we are interested in studying how  
36 experimental populations adapt to laboratory conditions within tens of generations, in which case we  
37 need to take both experiment- and population-related parameters into account.

38 Regardless of said difficulties, numerous experimental evolution studies, where populations are exposed  
39 to a controlled laboratory environment for some number of generations (Kawecki et al., 2012), have  
40 made remarkable discoveries on the genomic architecture of adaptation. Examples of long-term  
41 experimental evolution studies include those on yeast (Burke et al., 2014), red flour beetles (Godwin  
42 et al., 2017) and fruit flies (Turner et al., 2011; Debelle et al., 2017). By combining experimental  
43 evolution with next-generation sequencing, Evolve-and-Resequencing studies (E&R, **fig. 1**) can shed light  
44 on the genetic basis of short-term adaptation. The E&R set-up allows for describing the divergence  
45 between experimental treatments while accounting for variation among replicate populations  
46 (Schlötterer et al., 2015). In other words, to find signatures of selection, one must not only monitor  
47 allele frequency changes throughout the experiment but also search for consistency across replicates.  
48 Moreover, it is often the case that experimental populations are sampled and pooled for genome  
49 sequencing. Sequencing pooled samples of individuals (pool-seq) is cost-effective and produces largely  
50 accurate estimates of population allele frequencies (Futschik and Schlötterer, 2010). Thus, statistical  
51 methods developed for E&R studies are especially useful if our aim is to find signatures of selection  
52 across the genome. Notably so when we investigate allele frequency trajectories originating from pooled  
53 samples.

54 In contrast to E&R experiments in bacteria, those in sexual eukaryotes aim at describing adaptation due  
55 to standing genetic variation rather than that caused by new advantageous mutations. E&R time series  
56 datasets are particularly well-suited to fully characterise allele frequency trajectories. Several statistical  
57 approaches have been proposed to analyse these data and detect signatures of selection across the  
58 genome. A few such methods consider allele frequency changes between two time points. These simply  
59 identify those loci where there is a consistent difference in frequency between time points. One such  
60 approach is the widely-used Cochran-Mantel-Haenszel (CMH) test (Cochran, 1954). Such tests are  
61 often preferred since they are very fast, which makes them suitable for genome-wide datasets. Other  
62 approaches employ methods that allow for more than two time points: for example, Wiberg et al.  
63 (2017) used generalised linear models, and introduced a quasi-binomial distribution for the residual

64 error; and Topa et al. (2015) employed Gaussian Process models in a Bayesian framework to test for  
65 selection while accounting for sampling and sequencing noise. While the latter methods use more  
66 sophisticated statistical approaches, they remain descriptive and empirical with respect to underlying  
67 evolutionary processes. In contrast, mechanistic approaches explicitly model evolutionary forces, such as  
68 genetic drift and selection. Such models have the advantage that they can properly account for drift,  
69 which may generate allele frequency changes that can easily be mistaken for selection. Indeed, this is  
70 usually the case for E&R experimental populations with low effective population sizes ( $N_e$ ), where  
71 genetic drift is the main evolutionary force determining the fate of most alleles.

72 To our knowledge, three main mechanistic methods have thus far been developed: Wright-Fisher  
73 Approximate Bayesian Computation (WFABC, Foll et al. (2015)), Composition of Likelihoods for E&R  
74 experiments (CLEAR, Iranmehr et al. (2017)) and LLS (Linear Least Squares, Taus et al. (2017)).  
75 These methods differ in how they model drift and selection, the inferential approach to estimate  
76 selection coefficients, the hypothesis testing strategy, and the extent to which they consider specific  
77 experimental conditions (**table 1**). WFABC employs an ABC approach which uses summary statistics  
78 to compare simulated and real data. This method jointly infers the posterior of both  $N_e$  and the  
79 selection coefficient at some locus in the genome using allele frequency trajectory simulations. It  
80 performs simulations until both real and simulated summary statistics agree to a certain predefined  
81 scale. This makes WFABC computationally intensive. CLEAR computes maximum-likelihood estimates  
82 of selection parameters using a hidden Markov model tailored for small population sizes. LLS assumes  
83 that allele frequencies vary linearly with selection coefficients such that the slope provides the coefficient  
84 estimate. Although all three methods have been shown to accurately estimate selection coefficients,  
85 they rely heavily on empirical parameter distributions to perform hypothesis testing: (i) WFABC is  
86 highly dependent on the priors used to simulate those trajectories; (ii) CLEAR relies on genome-wide  
87 simulations to calculate an empirical likelihood-ratio statistic to assess significance; and (iii) LLS  
88 computes an empirical distribution of p-values simulated under neutrality. Additionally, the three  
89 software vary substantially on computational effort. Therefore, currently available methods are still  
90 limited in their use for genome-wide hypothesis testing.

91 Here, we propose a new Bayesian inference tool – Bait-ER – to estimate selection coefficients in E&R  
92 time series data. It is suitable for large genome-wide polymorphism datasets and particularly useful for  
93 small experimental populations. We show that our method is faster than other available software (when  
94 accounting for hypothesis testing) while still performing accurately in some particularly difficult  
95 scenarios.

## 96 **2 New Approaches**

97 E&R experiments produce a remarkable amount of data, namely allele counts for thousands to millions  
98 of loci. We created a Bayesian framework to infer and test for selection at an individual locus that is  
99 based on the Moran model. The Moran model is especially useful for studies that have overlapping  
100 generations, such as insect cage experimental designs (**fig. 1**). Such cage experiments are easier to  
101 maintain in the lab and allow for larger experimental population sizes avoiding potential inbreeding  
102 depression and crashing populations. Furthermore, Bait-ER combines modelling the evolution of an  
103 allele that can be under selection while accounting for sampling noise to do with pooled sequencing and  
104 finite sequencing depth. Our method takes allele count data in the widely-used sync format (Kofler  
105 et al., 2011) as input. Each locus is described by allele counts per time point and replicate population.  
106 The algorithm implemented includes the following key steps:

- 107 1. Bait-ER calculates the virtual allele frequency trajectories accounting for  $N_e$  that is provided by  
108 the user. This step includes a binomial sampling process that corrects for pool-seq-associated  
109 sampling noise.
- 110 2. The log posterior density of  $\sigma$  is calculated for a given grid of  $\sigma$ -values. This step requires  
111 repeatedly assessing the likelihood function (equation 3 in section 4).
- 112 3. The log posterior values obtained in the previous step are fitted to a gamma surface (details on  
113 surface fitting can be found in **supplementary fig. S1**).
- 114 4. Bait-ER returns a set of statistics that describe the posterior distribution of  $\sigma$  per locus. In  
115 particular, the average  $\sigma$  and the log Bayes Factor (BF) are the most important quantities. In this  
116 case, BFs test the hypothesis that  $\sigma$  is different from 0. Bait-ER also returns the posterior shape  
117 and rate parameter values,  $\alpha$  and  $\beta$ , respectively. These can be used to compute other relevant  
118 statistics (e.g., credible intervals, variance).

119 As our new approach was implemented in a Bayesian framework, it allows for measuring uncertainty  
120 associated with inference, for it gives posterior distributions of any selection parameters. Bait-ER jointly  
121 tests for selection and estimates selection parameters contrary to other state-of-the-art methods. It  
122 does not rely on empirical or simulation-based approaches that might be computationally intensive, and  
123 it properly accounts for specific shortcomings of E&R experimental design. Bait-ER performs well even  
124 for trajectories simulated under complex demographic scenarios.

## 125 **3 Results and Discussion**

### 126 **3.1 Prior fitting with Bait-ER**

127 Bait-ER employs a Bayesian approach outlined in the New Approaches section and described in further  
128 detail in the Methods section. Bayesian model fitting depends on the prior distribution implemented and  
129 requires further testing. Bait-ER uses a gamma prior for which the shape  $\alpha$  and rate  $\beta$  parameters have  
130 to be defined beforehand. We tested the impact of uninformative ( $\alpha = \beta = 0.001$ ) and informative  
131 ( $\alpha = \beta = 10^5$ ) gamma priors on the posterior distribution of  $\sigma$  under standard (60x coverage, 5 time  
132 points and 5 replicates) and sparse (20x coverage, 2 time points and 2 replicates) E&R experiments.  
133 Our results show that the prior parameters have virtually no impact on the posterior estimates when  
134  $\alpha = \beta < 100$  (**fig. 2** and **supplementary fig. S1**), and thus, by default, Bait-ER sets both prior  
135 parameters to 0.001.

136 Calculating the posterior distribution of  $\sigma$  is a computationally intensive step because it requires solving  
137 the exponential Moran matrix for several  $\sigma$ -values. To reduce the number of times Bait-ER assesses the  
138 log-posterior, we fit the posterior density to a gamma distribution. We found that a gamma surface fits  
139 the posterior quite well, and further that five points are enough to provide a good estimate of its  
140 surface. This remains true even for neutral scenarios, where the log-likelihood functions are generally  
141 flatter (**fig. S1**).

### 142 **3.2 Impact of E&R experimental design on detecting targets of selection**

143 Bait-ER not only models the evolution of allele frequency trajectories but it also considers aspects of  
144 the experimental design specific to E&R studies. Bait-ER can thus be used to gauge the impact of  
145 particular experimental conditions in pinpointing targets of selection. We simulated allele frequency  
146 trajectories by considering a range of experimental parameters, including the number and span of  
147 sampled time points, the number of replicated populations, and the coverage. Each of these settings  
148 was tested in different population scenarios that we defined by varying the population size, starting  
149 allele frequency, and selection coefficient. We assessed the error of the estimated selection coefficients  
150 by calculating the absolute bias in relation to the true value. In total, we investigated 576 scenarios  
151 (**Supplementary table S2**). The heatmaps in **figure 3A-C** show the error for each scenario.

152 The heatmaps A, B, and C of **figure 3** show that the initial frequency is a determining factor in the  
153 accuracy of  $\hat{\sigma}$  in E&R experiments. We observed that trajectories starting at very low frequencies  
154 (around 0.01) may provide unreliable estimates of  $\sigma$ . However,  $\hat{\sigma}$ 's accuracy on those trajectories can  
155 be improved by either increasing the sequencing depth or the number of replicates. Similar results have

156 been obtained using other methods such as in Kofler and Schlötterer (2014) and Taus et al. (2017).  
157 Designs with high coverage and several replicates may be appropriate when potential selective loci  
158 appear at low frequencies (e.g., dilution experiments). Surprisingly, alternative sampling schemes do not  
159 seem to substantially impact the accuracy of  $\sigma$  (**supplementary text S1**). These results have practical  
160 importance because sampling additional time points is time-consuming and significantly increases the  
161 cost of E&R experiments.

### 162 **3.2.1 A note on population size**

163 When using Bait-ER to estimate selection coefficients, one needs to specify the effective population  
164 size  $N_e$ . However, as effective population size and strength of selection are intertwined, misspecifying  $N_e$   
165 will directly affect estimates of selection. The effective population size is often not known at the start  
166 of the experiment, but plenty of methods can estimate it from genomic data, e.g., Jonas et al. (2016).  
167 To assess the impact of misspecifying the effective population size on  $p(\sigma)$ , we simulated allele  
168 frequency trajectories using a fixed population size of 300 individuals. We then ran Bait-ER setting the  
169 effective population size to 100 or 1000. By doing so, we are increasing and decreasing, respectively,  
170 the strength of genetic drift relative to the true simulated population.

171 Bait-ER seems to produce highly accurate estimates of  $\sigma$  regardless of varying the effective population  
172 size (**fig. 4** and **supplementary fig. S5**). This is the case since misspecifying  $N_e$  merely rescales time  
173 in terms of Moran events rather than changing the relationship between  $N_e$  and the number of Moran  
174 events in the process. Further, we observed that the BFs are generally higher when the specified  $N_e$  is  
175 greater than the true value, suggesting that an increased false positive rate. The opposite pattern is  
176 observed when the population size one specifies is lower than the real parameter. Additionally, we  
177 investigated the relationship between BFs computed with the true  $N_e$  and those produced under a  
178 misspecified  $N_e$ . We found that these BFs are highly correlated (Spearman's correlation coefficients  
179 were always higher than 0.99; **fig. 4** and **supplementary fig. S5**). Taken together, our results indicate  
180 one should use a more stringent BF acceptance threshold if estimates of the real effective population  
181 size have wide confidence intervals.

182 Furthermore, we assessed Bait-ER's computational performance by comparing the relative CPU time  
183 while varying several user-defined experimental parameters. We found that increasing the effective  
184 population affects our software's computational performance most substantially (31-fold increase in  
185 CPU time when increasing the simulated population size from 300 to 1000 individuals; supplementary  
186 **table S1**).

### 187 3.3 Benchmarking Bait-ER with LLS, CLEAR and WFABC

#### 188 3.3.1 Simulated Moran trajectories

189 To compare the performance of Bait-ER to that of other relevant software, we set out to simulate  
190 Moran frequency trajectories under the base experiment conditions described above. We tested Bait-ER  
191 as well as CLEAR (Iranmehr et al., 2017), LLS (Taus et al., 2017) and WFABC (Foll et al., 2015) on  
192 100 trajectories for 4 starting frequencies (ranging from 1% to 50%) and 4 selection coefficients  
193 ( $0 \leq N_e\sigma \leq 10$ ). All population parameters were tested for both 75 and 150 generations of  
194 experimental evolution. **Figure 5** shows the  $\sigma$  estimates for all methods under two starting frequency  
195 scenarios – 10% and 50%. CLEAR and LLS largely agree with Bait-ER's estimates of  $\sigma$ , even though  
196 the level of statistical significance is often not the same. It is evident that LLS produces estimates that  
197 are not as accurate as CLEAR's. This might have to do with the former not explicitly considering  
198 sampling bias in pool-seq data as a direct source of error. On the other hand, WFABC systematically  
199 disagrees with Bait-ER's estimates because its distribution is very skewed towards high selection  
200 coefficients. This is perhaps unsurprising given that WFABC does not consider replicate populations nor  
201 does it account for finite sequencing depth unlike the other three methods. We have included WFABC  
202 in our study for comparing Bait-ER with another Bayesian method. However, WFABC was not designed  
203 for E&R experiments, hence its poor performance on our simulated datasets.

204 Despite Bait-ER and CLEAR generally agreeing on the estimates of  $\sigma$ , there are a few trajectories that  
205 result in divergent estimates between these two methods. This is the case for those estimates seen on  
206 the top right plot in the leftmost corner in **figure 5**. In these few cases, Bait-ER overestimates  $\sigma$ ,  
207 whereas CLEAR produces estimates closer to the true value. We investigated these further, and it  
208 seems that most alleles get lost – or fixed if we consider the alternative allele – between the first and  
209 the second time point. Furthermore, Bait-ER's BFs are also significant (mean approx. 6.4), suggesting  
210 our method is reflecting consistency across replicates (for further details, see **fig. S6**).

211 Regarding computational performance, Bait-ER seems to be the fastest of the four methods, even  
212 though it is comparable to WFABC (see **fig. 6**). However, we tested WFABC on the first replicate  
213 population data rather than the five experimental replicates used for the three remaining methods.  
214 Additionally, WFABC does not provide any statistical testing output such as a Bayes Factor. All these  
215 features make Bait-ER more thorough and just as fast as WFABC. In contrast, CLEAR and LLS are  
216 slower than the other two approaches. While CLEAR takes less than 40 seconds on average to analyse  
217 100 sites, LLS is the slowest of the four, averaging around 4 minutes. Overall, these results suggest  
218 Bait-ER is just as accurate and potentially faster than other currently available approaches, which  
219 makes it a good resource for testing and inferring selection from genome-wide polymorphism datasets.



### 220 3.3.2 Complex simulation scenarios with recombination

221 For a more comprehensive study of Bait-ER's performance, we have analysed a complex simulated  
222 dataset produced by Vlachos et al. (2019). The authors simulated an E&R experiment inspired by the  
223 experimental setup of Barghi et al. (2019) and used polymorphism data from a *Drosophila melanogaster*  
224 population. In particular, we choose to focus on the classic sweep scenario, which is one of three  
225 complex scenarios simulated in Vlachos et al. (2019). For the sweep scenario, each experiment had 30  
226 targets of selection randomly distributed along the chromosome arm. Each SNP was simulated with a  
227 fixed selection coefficient of 0.05. This dataset is key for benchmarking software like Bait-ER because it  
228 accounts for varying rates of recombination along the genome as well as replicated populations.

229 ROC (Receiver Operating Characteristic) curves are compared for five methods, Bait-ER, CLEAR, the  
230 CMH test (Agresti, 2003), LLS and WFABC, similarly to figure 2A in Vlachos et al. (2019). Bait-ER  
231 performs well with an average true positive rate of 80% at a 0.2% false positive rate (**fig. 7**). Its  
232 performance is as good as the CMH test's, but it does underperform slightly in comparison to CLEAR.  
233 Bait-ER, CLEAR and the CMH test greatly overperform LLS and WFABC.

234 ROC curves serve the purpose of showing how a method's level of statistical significance compares to  
235 other methods', may it be a p-value or a BF. It addresses whether the method places the true targets  
236 of selection amongst its highest scoring hits. While this is informative, it fails to account for the  
237 importance of finding a suitable significance threshold. For example, **figure 7** suggests that Bait-ER  
238 and the CHM test perform very similarly. However, the CHM test returns more potential targets than  
239 Bait-ER when comparable thresholds are used for both methods (e.g. **figure 10** that shows the  
240 comparison between Bait-ER logBFs and CMH test p-values for a real *D. simulans* dataset). This  
241 indicates that Bait-ER is more conservative and that the CMH test is more prone to producing false  
242 positives.

243 To assess why Bait-ER seems to be outperformed by CLEAR, we further investigated CLEAR's  
244 selection coefficient estimates. Comparison of selection coefficients estimated by Bait-ER and CLEAR  
245 showed that Bait-ER is slightly more accurate at estimating true targets'  $\sigma$  (**fig. S7**). In addition, it  
246 seems that those trajectories that scored highest with CLEAR are also the highest Bait-ER  $\hat{\sigma}$  (**fig. S8**).  
247 Overall, Bait-ER and CLEAR perform to a similar high standard. However, the frequency variance filter  
248 implemented in Bait-ER seems to explain our method's slight underperformance shown in **figure 7**.  
249 Whilst the two method's false positive rates seem to be comparable, Bait-ER excluded a few selected  
250 sites from further analyses as they had changed very little in frequency throughout the experiment.  
251 Despite having excluded fewer than 70 (out of 30 targets times 100 experiments) targets of selection,  
252 Bait-ER's filtering step has also classified approximately the same amount of neutral trajectories for  
253 being too flat for inferring selection.

254 Overall, our results indicate that the dataset might be impacted by a phenomenon known as  
255 Hill-Robertson Interference (HRI) (Hill and Robertson, 1966). This is when adaptation is hindered by  
256 linked positively selected loci. It can result in incomplete sweeps, which are often hard to detect.  
257 Bait-ER estimated scaled selection coefficients ranged from 5.85 to 43.2, which suggests each target  
258 was under strong selection. Such values should be enough for selection to overcome genetic drift unless  
259 there is some degree of interference between selected sites within a 16Mb region. For the undetected  
260 targets of selection, the HRI effect and inconsistent responses between replicate populations might  
261 cause Bait-ER not to perform optimally.

### 262 **3.4 Analysing E&R data from hot adapted *Drosophila simulans* populations**

263 We have applied Bait-ER to a real E&R dataset that was published by Barghi et al. (2019). The  
264 authors exposed 10 experimental replicates of a *Drosophila simulans* population to a new temperature  
265 regime for 60 generations. Each replicate was surveyed using pool-seq every 10 generations. This  
266 dataset is particularly suited to demonstrate the relevance of our method, as Barghi et al. (2019)  
267 observed a strikingly heterogeneous response across the 10 replicates. The highly polygenic basis of  
268 adaptation has proved challenging to measure and summarise thus far.

269 The *D. simulans* genome dataset is composed of six genomic elements: chromosomes 2-4 and  
270 chromosome X. For each element, we have estimated selection parameters using Bait-ER. **Figure 8**  
271 shows a Manhattan plot of BFs for the right arm of chromosome 3. We can observe that there are two  
272 distinct peaks across the chromosome arm that seem highly significant (BF greater than 9). These two  
273 peaks – one at the start and another just before the centre of the chromosome – should correspond to  
274 loci that responded strongly to selection in the new lab environment. Such regions display a consistent  
275 increase in frequency across replicate populations. Overall, there are only a few other peaks that exhibit  
276 very strong evidence for selection across the genome (**fig. S10**). Those are located on chromosomes  
277 2L, 2R and 3L. When compared to the CMH test results as per Barghi et al., Bait-ER's most  
278 prominent peaks seem to largely agree with those produced by the CMH (see **fig. S11**). The same is  
279 true for high BF regions on chromosomes 2L and 2R where there are similarly located p-value chimneys  
280 at the start of these genomic elements (**fig. S12**). Both Bait-ER and the CMH test did not produce  
281 clear signals of selection on chromosomes 3L, 4 and on the X.

282 One of the advantages of Bait-ER is that we have implemented a Bayesian approach for estimating  
283 selection parameters, which means we can calculate both the mean and variance of the posterior  
284 distributions. To examine both of these statistics, we looked into how the posterior variance varies as a  
285 function of mean  $\sigma$ . **Figure 9** shows the relationship between variance and mean selection coefficient  
286 for the X chromosome. We observe that the highest mean values also correspond to those with the

287 highest variance. Interestingly, most of those do seem to be statistically significant at a fairly lenient  
288 threshold ( $BF = 2$ ). This suggests that the strongest response to selection, i.e. the highest estimated  
289  $\sigma$  values, are also those showing a highly heterogeneous response across replicates. The remaining  
290 genomic elements seem to show similar patterns, apart from chromosome 4 (see **fig. S13**). This is  
291 consistent with other reports that inferring selection on this chromosome is rather difficult due to its  
292 size and low levels of polymorphism (Jensen et al., 2002).

293 Finally, we compared the p-values obtained by Barghi et al. (2019) and the BFs computed by Bait-ER.  
294 Barghi and colleagues performed genome-wide testing for targets of selection between first and last time  
295 points using the CMH test. The tests seem to largely agree for the most significant BFs correspond to  
296 the most significant p-values. However, Bait-ER appears to be more conservative than the CMH test.  
297 This follows from the finding that there is quite a substantial proportion of loci (less than 10% of all  
298 loci) that are deemed significant by a p-value threshold of 0.01, which are not accepted as such by  
299 Bait-ER. This is true even for a BF threshold of 2 such as that shown in **figure 10** for chromosome 2L.

300 Overall, Bait-ER performs well on such small experimental population. Bait-ER was designed to account  
301 for strong genetic drift on such small populations, hence the use of a discrete-population state space. It  
302 is rather conservative and produces only a few very significant peaks across the genome, which suggests  
303 it has a low false positive rate. Most of the genome produced BFs greater than 2, indicating that there  
304 is not enough resolution to narrow down candidate regions to specific genes despite those very  
305 significant peaks. Barghi et al. (2019) argue that there is strong genetic redundancy caused by a highly  
306 polygenic response to selection in their experiment. Despite Bait-ER modelling sweep-like scenarios  
307 rather than the evolution of a quantitative trait, the overall elevated BF signal across the genome might  
308 indicate that the genetic basis of adaptation to this new temperature regime is rather polygenic.

### 309 **3.5 Conclusions and future directions**

310 One of the main aims of E&R studies is to find targets of selection in genome-wide datasets. For that,  
311 we developed an approach that uses time series allele frequency data to estimate selection parameters.  
312 Bait-ER is a flexible statistical approach for inferring and testing for selection in laboratory experiments.  
313 It is faster and just as accurate as other relevant software. In addition, Bait-ER's implementation of the  
314 Moran model makes it suitable for experimental set-ups with overlapping generations. This is an  
315 advantage since it can be used in many large scale E&R designs.

316 Our results suggest that Bait-ER's inference is mostly affected by low starting allele frequencies.  
317 However, this can be overcome should the sequencing depth or the number of experimental replicates  
318 be increased. Although increasing the number of replicates might increase the cost of setting up an  
319 E&R experiment quite substantially, an improved sequencing depth is certainly within reach. This

320 interesting result might help guide future research. Encouragingly, Bait-ER performed well at small  
321 manageable population sizes, suggesting replication is key, but large populations are not necessarily  
322 required for achieving good results.

323 One aspect of time series polymorphism datasets that is worth our attention is that of missing data. It  
324 is sometimes the case that there is no frequency data at consecutive time points for a given trajectory.  
325 In the future, we will extend Bait-ER to allow for missing time points. Such a feature will enable one  
326 not to discard alleles for which not all time points have been sequenced. Using a probabilistic approach  
327 to estimate missing allele frequencies, Bait-ER will then be able to cope with missing data and estimate  
328 selection parameters.

329 Our approach assumes that each site in the genome is independent from one another. However, all  
330 selected sites will affect neighbouring loci. Neutral sites will increase in frequency towards fixation along  
331 which the true targets of selection. This causes allele frequencies to co-vary and selection to be  
332 overestimated around selected sites. On the other hand, the interference between positively selected  
333 sites, the HRI effect, leads to underestimation of the selection coefficients. Bait-ER can be extended to  
334 explicitly account for linkage, which decays with distance from any given locus under selection.  
335 Modelling the evolution of linked sites is not trivial, but it can be achieved if one includes information on  
336 the recombination landscape in the future.

## 337 4 Material and Methods

### 338 4.1 Modelling allele trajectories

339 Let us assume that there is a biallelic locus with two alleles,  $A$  and  $a$ . The evolution of allele  $A$  in time  
 340 is fully characterised by a frequency trajectory in the state space  $\{n_A, (N - n)_a\}$ , where  $n$  is the total  
 341 number of individuals that carry allele  $A$  (in a population of size  $N$ ). Supposing the allele evolves  
 342 according to the Moran model, the transition rates for the process are the following

$$\begin{aligned} n \rightarrow n - 1 &: \frac{n(N-n)}{N} \\ n \rightarrow n + 1 &: \frac{n(N-n)}{N}(1 + \sigma) \end{aligned} \quad , \quad (1)$$

343 where  $1 + \sigma$  is the fitness of any  $A$ -type offspring and  $\sigma$  the selection coefficient for allele  $A$ . If  $\sigma = 0$ ,  
 344 i.e.  $A$  is evolving neutrally, then none of the alleles is preferred at reproduction. Let  $X_t$  be the number  
 345 of copies of  $A$  in a population of  $N$  individuals; the probability of a given allele trajectory  $\mathbf{X}$  can be  
 346 defined using the Markov property as

$$p(\mathbf{X} | \sigma) = p(X_0 = x_0) \prod_{t=1}^T p(X_t = x_t | X_{t-1} = x_{t-1}, \sigma) \quad , \quad (2)$$

347 where  $T$  is the total number of time points measured in generations at which the trajectory was  
 348 assayed. The conditional probability on the left-hand side of the equation has one calculating  
 349  $X_t = e^{Qd_t} X_{t-1}$ , where  $Q$  is the rate matrix defined in (1) and  $d_t$  the difference in number of  
 350 generations between time point  $t$  and  $t - 1$ . The probability of a single allele frequency trajectory can  
 351 be generalised for  $R$  replicates by assuming their independence

$$p(\mathbf{X} | \sigma) = \prod_{r=1}^R p(X_0^r = x_0^r) \prod_{t=1}^T p(X_t^r = x_t^r | X_{t-1}^r = x_{t-1}^r, \sigma) \quad . \quad (3)$$

352 The main caveat for pool-seq data is the fact that it provides estimates for allele frequencies, not true  
 353 frequencies. For that reason, we assume that the allele counts are generated by a binomial sampling  
 354 process  $B(n/N, C)$  which depends on the frequency of allele  $A$  and the total sequencing depth  $C$   
 355 obtained by pool-seq. We then recalculate the probability of the Moran states given an observed allele  
 356 count  $c$  by considering the inverse of the binomial sampling process

$$p(\{nA, (N - n)a\} | \{c, C\}) \propto \binom{C}{c} \left(\frac{n}{N}\right)^c \left(1 - \frac{n}{N}\right)^{C-c}, \quad n = 0, \dots, N \quad . \quad (4)$$

357 This step is key for it corrects for sampling noise generated during data acquisition. This is particularly  
 358 relevant for low frequency alleles and poorly covered loci.

## 359 4.2 Inferential framework

360 We used a Bayesian framework to estimate  $\sigma$ . It requires allele counts and coverage for each time point  
 361 and replicate population  $\{\mathbf{c}, \mathbf{C}\}$  at each position as input. The posterior distribution can then be  
 362 obtained by

$$p(\sigma|\{\mathbf{c}, \mathbf{C}\}) \propto p(\sigma)p(\{\mathbf{c}, \mathbf{C}\}|\sigma) \quad . \quad (5)$$

363 Our algorithm is defined using a gamma prior on  $\sigma$ . The posterior cannot be formally obtained, hence  
 364 we define a grid of  $\sigma$  values for which we calculate the posterior density. Estimating the posterior  
 365 distribution  $p(\sigma|\{\mathbf{c}, \mathbf{C}\})$  is a time consuming part of our algorithm because the likelihood is  
 366 computationally costly to compute. To avoid this burden, we fit the posterior to a gamma density

$$\log p(\sigma|\{\mathbf{c}, \mathbf{C}\}) = c + (\alpha - 1) \log \sigma - \beta \sigma \quad , \quad (6)$$

367 where  $\alpha$  and  $\beta$  are the shape and rate parameters, respectively, and  $c$  the normalization constant. The  
 368 gamma fitting represents a good trade-off between complexity, since it only requires two parameters,  
 369 but its density may take many shapes. As one requires the values of  $\alpha$  and  $\beta$  that best fit the gamma  
 370 density for further analyses, we find the least squares estimates of  $\alpha$  and  $\beta$  (and  $c$ ), such that the error  
 371 is minimal. The estimation is as follows

$$\hat{\alpha} = \frac{-(s_2 s_4 + s_4^2 - s_6 - s_7)(s_1^2 - s_8) - (s_3 + s_1 s_2 + s_1 s_4 + s_5)(s_1 s_4 - s_5)}{s_7 s_1^2 - 2 s_4 s_5 s_1 + s_5^2 + s_4^2 s_8 - s_7 s_8} \wedge$$

$$\hat{\beta} = \frac{-s_3 s_4^2 + s_2 s_5 s_4 + s_1 s_6 s_4 - s_5 s_6 - s_1 s_2 s_7 + s_3 s_7}{s_7 s_1^2 - 2 s_4 s_5 s_1 + s_5^2 + s_4^2 s_8 - s_7 s_8} \quad , \quad (7)$$

372 where  $s_1 = \sum_i x_i/N$ ,  $s_2 = \sum_i y_i/N$ ,  $s_3 = \sum_i x_i y_i/N$ ,  $s_4 = \sum_i \log x_i/N$ ,  $s_5 = \sum_i x_i \log x_i/N$ ,  
 373  $s_6 = \sum_i y_i \log x_i/N$ ,  $s_7 = \sum_i \log^2 x_i/N$  and  $s_8 = \sum_i x_i^2/N$ . We evaluated the fitting of the gamma  
 374 density for neutral and selected loci, and observed that a gamma surface with five points describes the  
 375 log posterior of selected and neutral loci quite suitably (**fig. S1**).

376 Additionally, Bait-ER was implemented with an allele frequency variance filter that is applied before  
 377 performing the inferential step of our algorithm. This filtering process excludes any trajectories that do  
 378 not vary or vary very little throughout the experiment from further analyses. To do that, we assess the  
 379 trajectories' frequency increments and exclude loci with frequency variance lower than 0.01. These  
 380 correspond to cases where trajectories are too flat to perform any statistical inference on. Trajectories  
 381 such as these typically have both inflated  $\hat{\sigma}$  and BFs.

382 Bait-ER is implemented in C++ and freely available for download at  
 383 <https://github.com/mrborges23/Bait-ER> (accessed on December 12<sup>th</sup> 2020). Here, we provide a  
 384 tutorial on how to compile and run Bait-ER, including a toy example with 100 loci taken from Barghi

385 et al. (2019).

### 386 **4.3 Simulated data**

387 We tested our algorithm's performance under several biologically relevant scenarios using (1) a Moran  
388 model allele frequency trajectory simulator, and (2) the individual-based forward simulation software  
389 MimicrEE2 (Vlachos and Kofler, 2018).

390 The Moran model simulator was used, firstly, for benchmarking Bait-ER's performance across a range  
391 of experimental conditions, and, secondly, to compare our estimates of  $\sigma$  to those of CLEAR (Iranmehr  
392 et al., 2017), LLS (Taus et al., 2017) and WFABC (Foll et al., 2015). We started out by testing  
393 Bait-ER under different combinations of experimental and population parameters. A full description of  
394 these parameters can be found in **table S2**. Scenarios that explored several experimental designs  
395 included those with varying coverage (20x, 60x and 100x), number of replicate populations (2, 5 and  
396 10) and number of sampled time points (2, 5 and 11). In addition to simulating even sampling  
397 throughout the experiment, we tested our method on trajectories where we varied sampling towards the  
398 start or towards the end of said experiment. Total study length might also affect Bait-ER's estimation,  
399 therefore we tracked allele frequency trajectories for  $0.2N_e$  and  $0.4N_e$  generations.

400 We set out to compare Bait-ER to other selection estimation software using experimental parameters  
401 that resemble realistic E&R designs. Our base experiment replicate populations consist of 300  
402 individuals that were sequenced to 300x coverage. There are five such replicates that were evenly  
403 sampled five times throughout the experiment. We then simulated 100 allele frequency trajectories for  
404 all starting frequencies and selection coefficients mentioned above. We simulated trajectories for  
405  $0.25N_e$  as well as  $0.5N_e$  generations.

406 The performance of both CLEAR and LLS was assessed by running the software on any sync file with a  
407 fixed population size of 300 individuals (flag `-N=300` and `estimateSH(..., Ne = 300)`, respectively).  
408 Additionally, to estimate the selection coefficient under the LLS model, we used the `estimateSH(...)`  
409 function assuming allele codominance (argument `h = 0.5`). WFABC was tested with a fixed population  
410 size of  $N_e$  individuals (flag `-n 300`), lower and upper limit on the selection coefficient of -1 and 1,  
411 respectively (flags `-min_s -1` and `-max_s 1`), maximum number of simulations of 10000 (flag `-max_sims`  
412 `10000`) and four parallel processes (flag `-n_threads 4`). The program was run for 1200 seconds, after  
413 which the process timed out to prevent it from running indefinitely in case fails to converge. This  
414 caused trajectories with starting allele frequencies of 5% and 1% not to be analysed at all. We have  
415 thus only been able to include results for alleles starting at 10% and 50% frequencies.

416 We used data simulated by Vlachos et al. (2019) using MimicrEE2 (Vlachos and Kofler, 2018) to

417 benchmark Bait-ER and compare it with other relevant statistical methods. MimicEE2 allows for whole  
418 chromosomes to be simulated under a wide range of parameters mimicking the effects of an E&R setup  
419 on allele frequencies. We used this data for it allows for testing our method including relevant biological  
420 parameters such as variation in recombination rate. Moreover, the simulated data were used to test the  
421 performance of other relevant statistical methods. This dataset consisted of 10 replicate experimental  
422 populations, and each experimental population consisted of 1,000 diploid organisms evolving for 60  
423 generations. The haplotypes used to found the simulated populations were based on 2L chromosome  
424 polymorphism patterns from *Drosophila melanogaster* fly populations (Bastide et al., 2013).  
425 Recombination rate variation was based on the *D. melanogaster* recombination landscape (Comeron  
426 et al., 2012). Low recombination regions were removed from the dataset. 30 segregating loci were  
427 randomly picked to be targets of selection with a selection coefficient of 0.05. Sites were initially  
428 segregating at a frequency between 0.05 and 0.95.

#### 429 **4.4 Application**

430 We applied our algorithm to the recently published dataset from an E&R experiment in 10 replicates of  
431 a *Drosophila simulans* population to a hot temperature regime for 60 generations (Barghi et al., 2019).  
432 All populations were kept at a census size of 1000 individuals. The experimental regime consisted of  
433 light and temperature varying every 12 hours. The temperature was set at either 18°C or 28°C to  
434 mimic night and day, respectively. The authors extracted genomic DNA from each replicate population  
435 every 10 generations using pool-seq. The polymorphism datasets are available at  
436 <https://doi.org/10.5061/dryad.rr137kn> in sync format. The full dataset consists of more than 5  
437 million SNPs. We subsampled the data such that Bait-ER was tested on 20% of the SNPs.  
438 Subsampling was performed randomly across the whole genome.



## 439 **5 Acknowledgements**

440 This work was supported by the Vienna Science and Technology Fund (WWTF) through project  
441 MA16-064. CK received funding from the Royal Society (RG170315) and Carnegie Trust (RIG007474).  
442 The computational results presented have been partly achieved using the St Andrews Bioinformatics  
443 Unit (StABU), which is funded by a Wellcome Trust ISSF award (grant 105621/Z/14/Z). We are  
444 grateful to Peter Thorpe for his help with using the StABU cluster. We thank Neda Barghi, Abigail  
445 Laver and Mike Ritchie for helpful discussions and suggestions on an early version of Bait-ER. The  
446 genome-wide scan for selected loci in the Barghi et al. (2019) dataset was conducted using the Vienna  
447 Scientific Cluster (VSC).

448 **6 Tables**

|                               | <b>WFABC</b>                                                                                                       | <b>CLEAR</b>                                                                                                                                    | <b>LLS</b>                                                                                                                                                                       | <b>Bait-ER</b>                                                                                                   |
|-------------------------------|--------------------------------------------------------------------------------------------------------------------|-------------------------------------------------------------------------------------------------------------------------------------------------|----------------------------------------------------------------------------------------------------------------------------------------------------------------------------------|------------------------------------------------------------------------------------------------------------------|
| Inference approach            | Approximate Bayesian computation                                                                                   | Maximum likelihood                                                                                                                              | Linear least squares*                                                                                                                                                            | Bayesian                                                                                                         |
| Hypothesis testing            | <ul style="list-style-type: none"> <li>• Bayes factors</li> <li>• Depends heavily on summary statistics</li> </ul> | <ul style="list-style-type: none"> <li>• Likelihood-ratio tests</li> <li>• Empirical p-values based on genome-wide drift simulations</li> </ul> | <ul style="list-style-type: none"> <li>• Empirical simulated p-values based on simulations of allele trajectories</li> </ul>                                                     | <ul style="list-style-type: none"> <li>• Bayes factors</li> <li>• Based on the posterior distribution</li> </ul> |
| Assumptions                   | <ul style="list-style-type: none"> <li>• WF model</li> </ul>                                                       | <ul style="list-style-type: none"> <li>• WF model</li> </ul>                                                                                    | <ul style="list-style-type: none"> <li>• WF and Moran model</li> <li>• The allele frequencies vary linearly with the selection coefficients</li> <li>• Weak selection</li> </ul> | <ul style="list-style-type: none"> <li>• Time-continuous Moran model</li> </ul>                                  |
| Accounts for replicates       | No                                                                                                                 | Yes                                                                                                                                             | Yes                                                                                                                                                                              | Yes                                                                                                              |
| Accounts for sequencing noise | No                                                                                                                 | Yes                                                                                                                                             | No                                                                                                                                                                               | Yes                                                                                                              |
| Reference                     | (Foll et al. 2015)                                                                                                 | (Iranmehr et al. 2017)                                                                                                                          | (Taus et al. 2017)                                                                                                                                                               | This study                                                                                                       |

Table 1: **Currently available software for estimating selection coefficients in E&R experiments.**<sup>a</sup>

<sup>a</sup>The table describes several features of each method namely: i) the approach used for inferring selection coefficients, ii) whether it performs hypothesis testing or not, iii) what sort of assumptions are made about the underlying population genetics model, iv) its overall computational and inference performance, v) whether it accounts for multiple replicate populations, and vi) whether it accounts for sampling variance due to sequencing noise. WF: Wright-Fisher. \*LLS under the assumption of linearity is equivalent to a maximum likelihood approach.

## 449 7 Figures

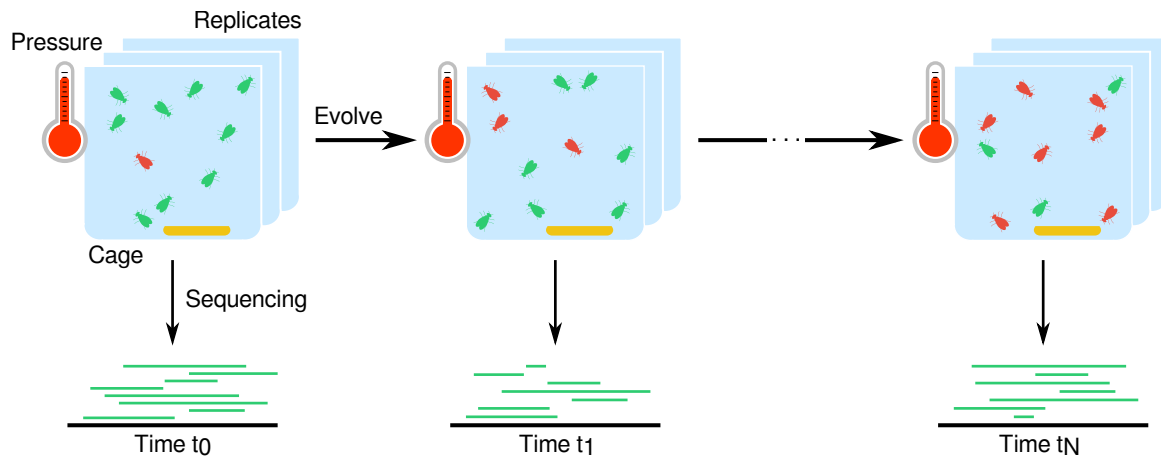

Figure 1: **Example of an E&R experimental setup.** E&R experiments expose several replicated populations (e.g., of flies, yeast, viruses) to a selective pressure (e.g., temperature, food regimes) for a specific number of generations  $t_T$ . The replicated populations are surveyed at several time points by whole-genome sequencing, which allows one to quantify changes in allele frequencies over time.

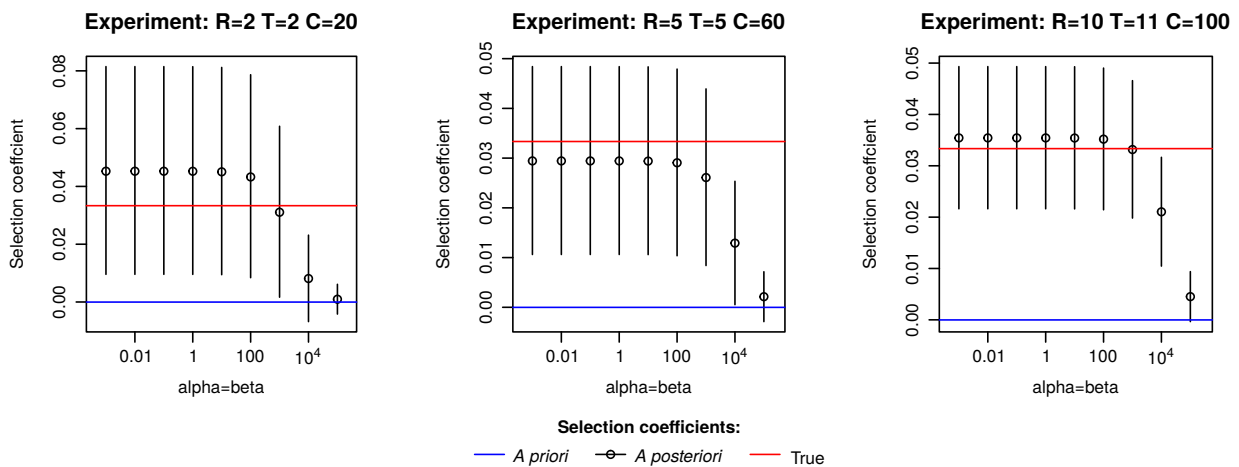

Figure 2: **Impact of the prior on the posterior estimates of the selection coefficients.** The posterior distribution of  $\sigma$  was calculated using gamma priors  $G(\alpha, \beta)$ , where  $\alpha$  and  $\beta$  are the shape and rate parameters. We set  $\alpha = \beta$  and allowed  $\beta$  to vary from 0.001 to  $10^5$  (i.e. ranging from a very uninformative to a very informative prior, respectively). The different priors were tested under three E&R experiment scenarios: the first was a sparse experimental design (coverage (C) = 20x, number of time points (T) = 2 and number of replicates (R) = 2), while the second mimicked a standard set up (C = 60x, T = 5 and R = 5). Finally, the third scenario had the most thorough experimental conditions (C = 100x, T = 11 and R = 10). Red lines indicate the true value of  $\sigma$ . Blue lines point to the mean of the prior imposed on  $\sigma$ . Black lines and points correspond to the posterior mean of  $\sigma$  and credibility intervals at 0.95.

### A. Number, span and distribution of sampled time points

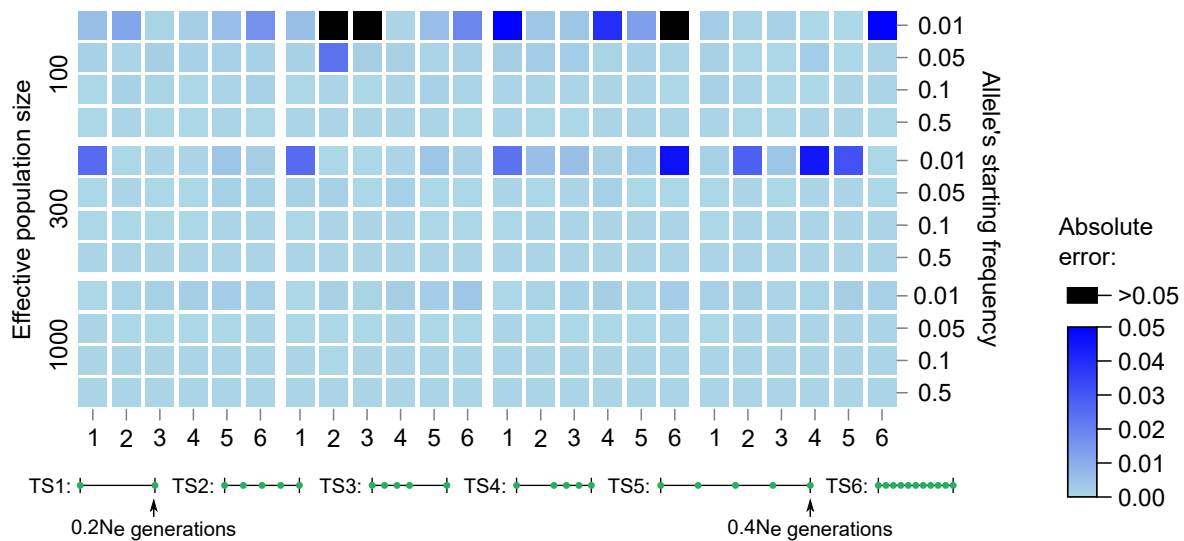

### B. Number of replicates

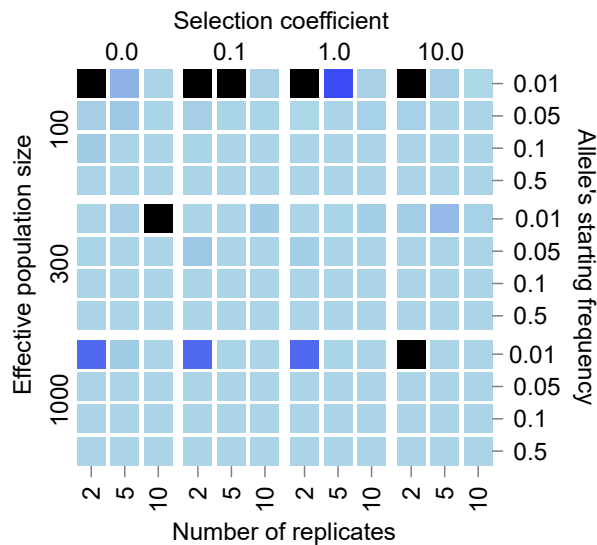

### C. Coverage

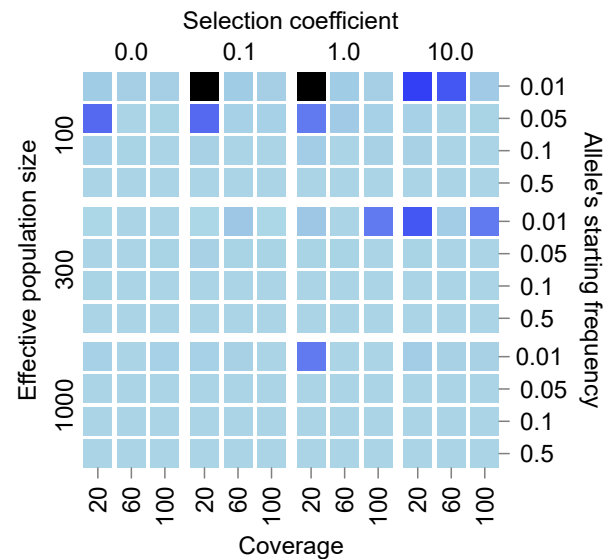

Figure 3: **Impact of E&R experimental design on the estimated selection coefficients.** Each square of the heatmap represents the error of the estimated selection coefficients, i.e., the absolute difference between the estimated and the true  $\sigma$ :  $|\hat{\sigma} - \sigma|$ , for a range of population dynamics and E&R experimental conditions. **(A)** Number, span and distribution of sampled time points. The six time schemes differ according to the following criteria: most time schemes have five sampling events, except for TS1 and TS6, which have two and eleven time points, respectively; all time schemes have a total span of  $N_e/5$  generations, except for TS5, which has double the span ( $2N_e/5$ ); uniform sampling was used in most scenarios but for TS3, which is more heavily sampled during the first half of the experiment, and TS4, during the second half. The two maximum experiment lengths considered ( $0.2N_e$  and  $0.4N_e$ ) were chosen based on typical E&R experimental designs. **(B)** number of replicates. **(C)** coverage. To test the experimental conditions, we defined a base experiment with five replicates, five uniformly distributed time points (total span of  $0.20N_e$  generations) and a coverage of 60x. The complete set of results is shown in **supplementary fig. S2-S5**.

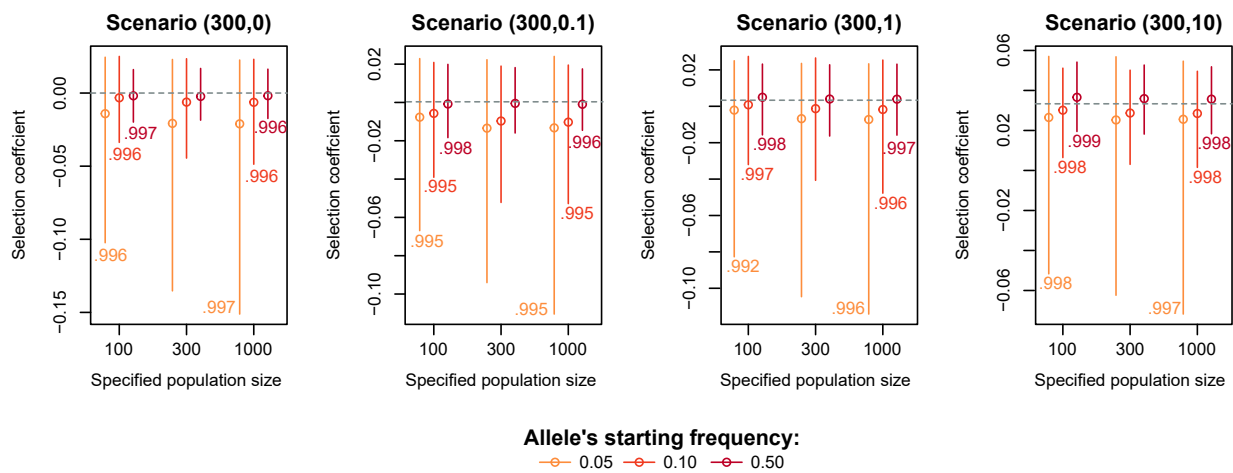

Figure 4: **Impact of the user-specified population size on the estimation of selection coefficients.** The plots show the distribution of the estimated selection coefficients where the population size is misspecified. Vertical lines and points indicate the interquartile range and median selection coefficient. Each plot represents a specific scenario that was simulated by varying the population size, the true selection coefficient (indicated within brackets ( $N_e, N_e\sigma$ )) and starting allele frequency (indicated by the yellow-to-red colour gradient). The numbers next to each bar correspond to the Spearman's correlation coefficient, which correlates the BFs of the 100 replicated trajectories between the cases where we have either under- and overspecified the population size ( $N_e = 100$  or  $1000$ , respectively) and the case where we use the true population size ( $N_e = 300$ ). Regarding simulated experimental design, we defined a base experiment with five replicates, five uniformly distributed time points (total span of  $0.20N_e$  generations) and a coverage of 60x.

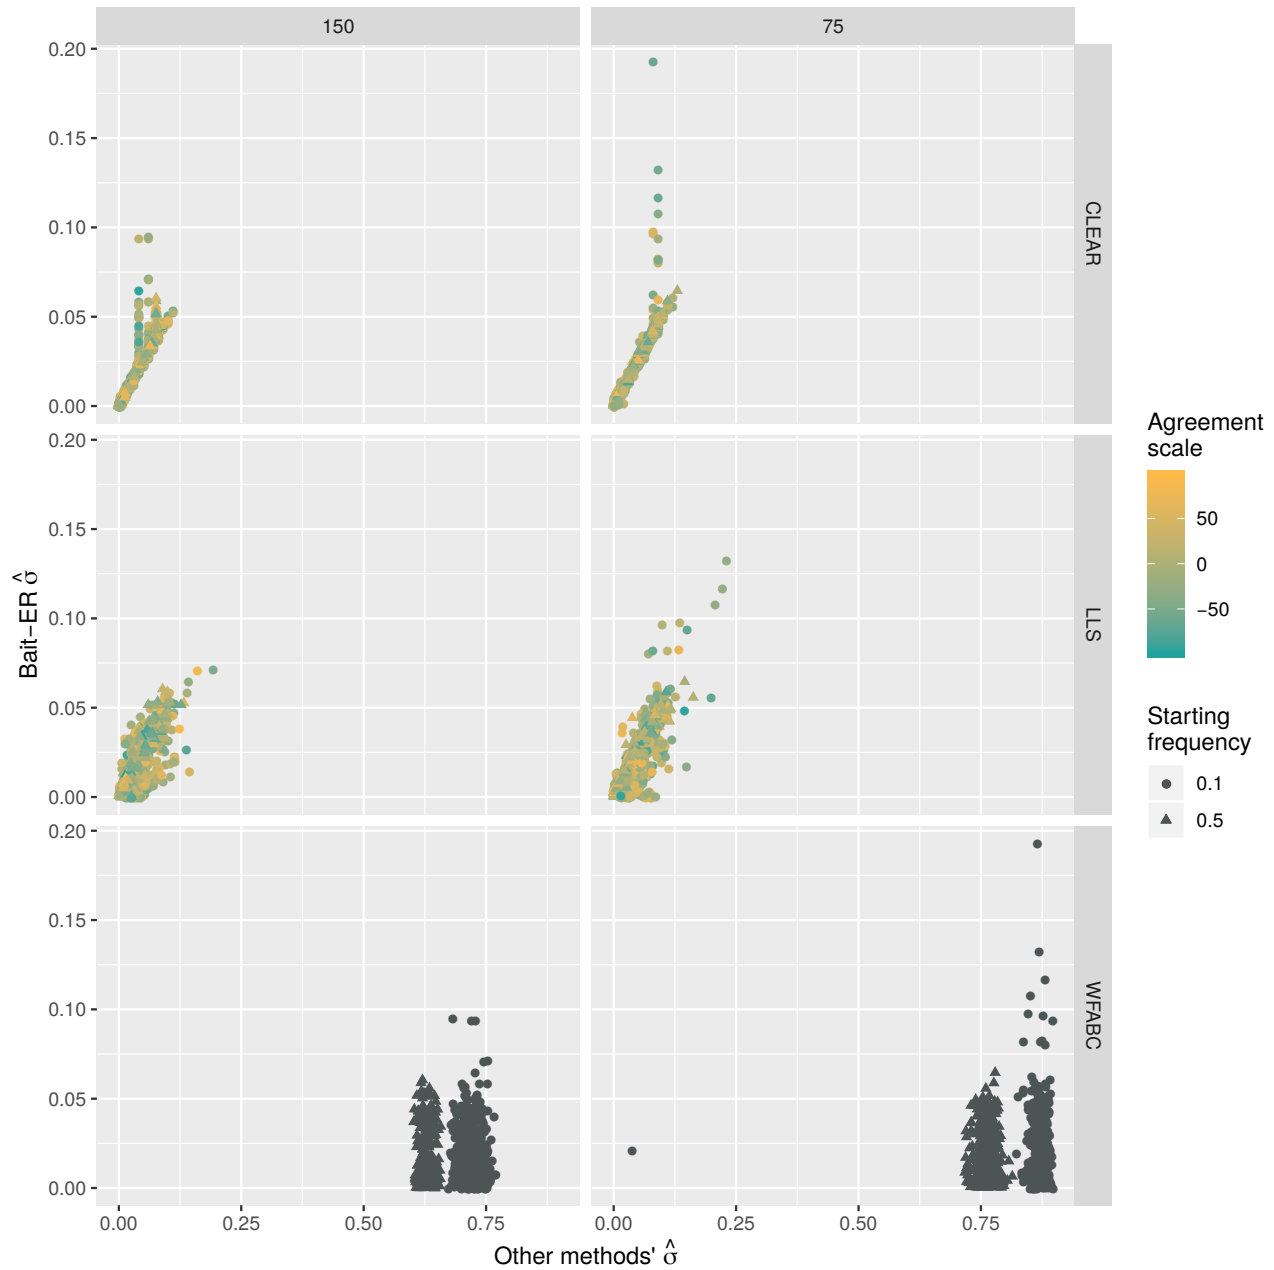

Figure 5: **Comparison of estimates of  $\sigma$  produced by Bait-ER versus CLEAR, LLS and WFABC.** These plots include estimates for those trajectories simulated with starting frequencies of 10% and 50%. Each horizontal panel compares Bait-ER's estimates to those produced by CLEAR, LLS and WFABC from top to bottom row, respectively. The left and right hand side panels correspond to two different experiment lengths: 150 and 75 generations, respectively. LLS returned NA's for 4 out of 800 trajectories which were excluded from these graphs.

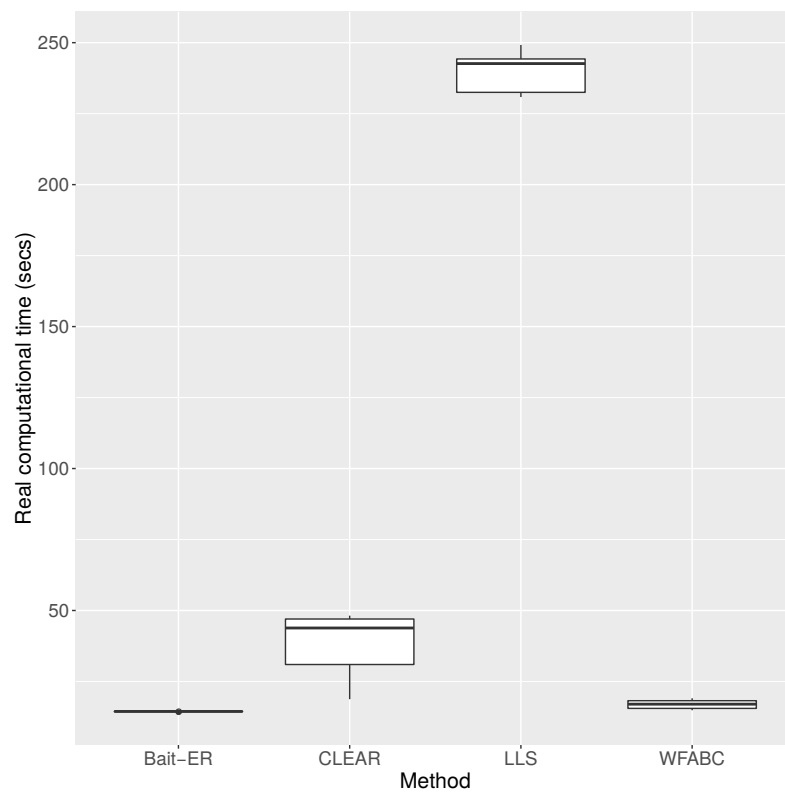

Figure 6: **Real computational time for Bait-ER and the other three approaches tested.** From left to right, computational time in seconds including both inference and hypothesis testing for Bait-ER, CLEAR, LLS and WFABC is shown here. Similarly to figure 5, these boxplots include estimates for those trajectories simulated with starting frequencies of 10% and 50%, as well as both study lengths investigated, i.e. 150 and 75 generations. Those 4 NA's produced by LLS were again removed from these plots.

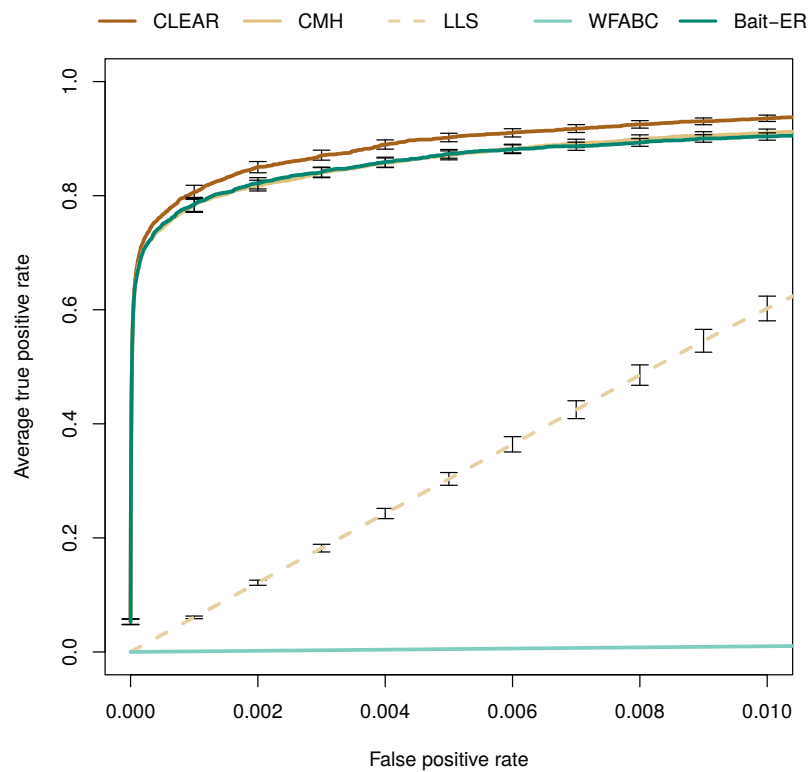

Figure 7: **Performance of Bait-ER and other software at testing for selection in a complex simulated dataset.** ROC (Receiver Operating Characteristic) curves for Bait-ER, CLEAR, CMH, LLS and WFABC under the classic sweep scenario simulated by Vlachos et al. (2019).



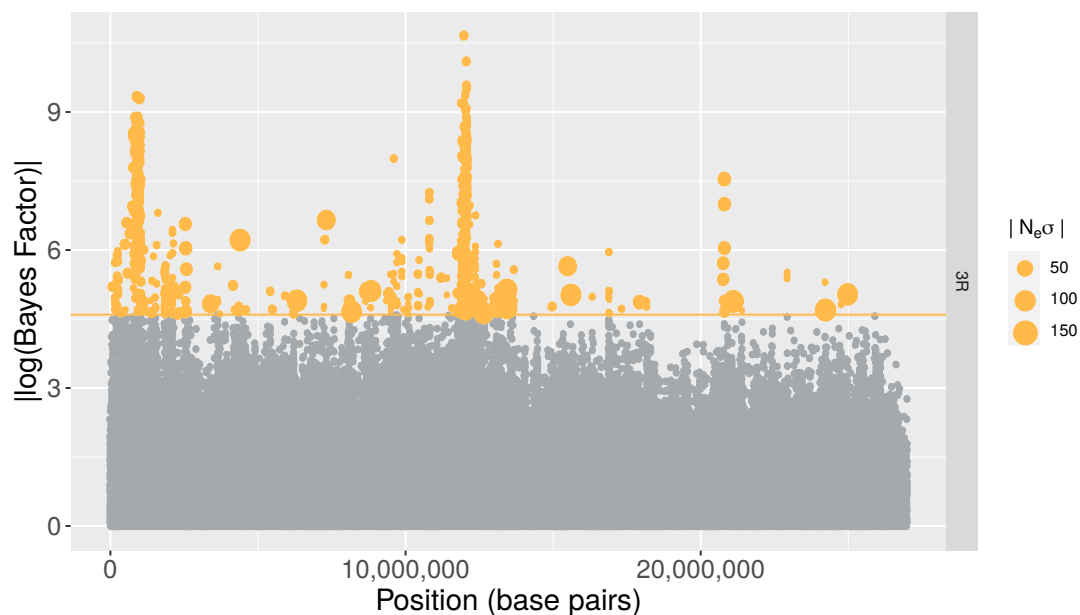

Figure 8: **Bayes Factors on chromosome 3R.** This Manhattan plot shows log-transformed Bayes Factors computed by Bait-ER for loci along the right arm of the 3<sup>rd</sup> chromosome in the Barghi et al. (2019) time series dataset. The orange line indicates a conservative threshold of approximately 4.6, which corresponds to  $\log(0.99/0.01)$ , meaning all points in orange have very strong evidence for these to be under selection. The SNPs that are significant at this level are sorted by size according to how strong Bait-ER's selection coefficients are. In other words, points are sized according to how strong the large selection coefficient is estimated to be.

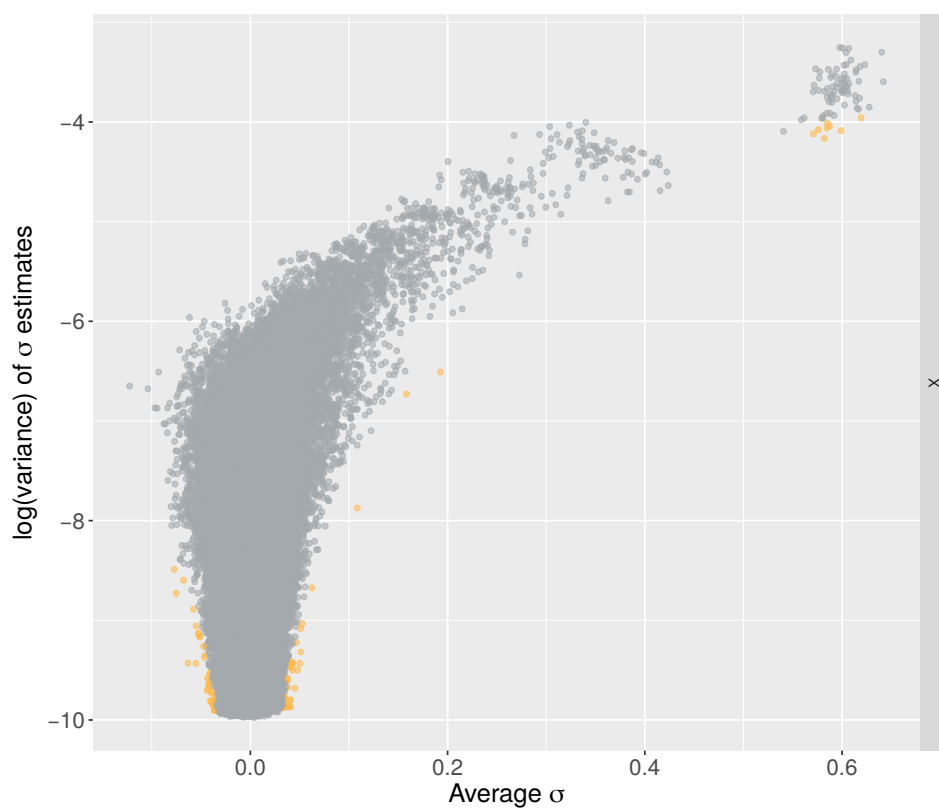

Figure 9: **Variance versus mean sigma on the X chromosome.** This graph compares log transformed variances in  $\sigma$  estimates to average  $\sigma$ s. The variance is calculated using the inferred rate and shape parameters for the beta distribution, and the average  $\sigma$  is the mean value of the posterior distribution estimated by Bait-ER. Orange coloured points are significant at a conservative BF threshold of  $\log(0.99/0.01)$ , approx. 4.6.

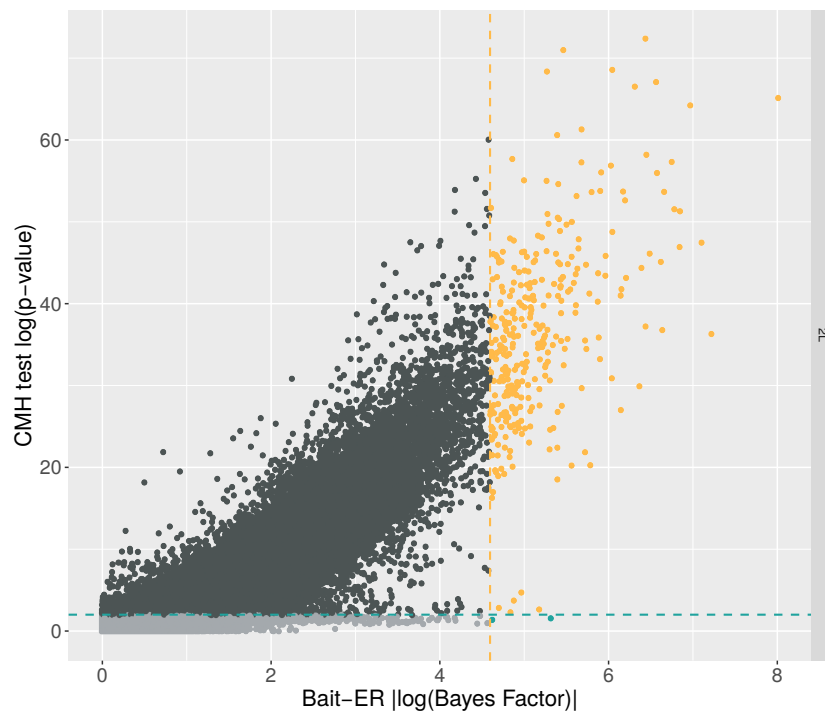

Figure 10: **Bait-ER's Bayes Factors versus CMH test's p-values on chromosome 2L.** Orange coloured points correspond to BFs which are greater than  $\log(0.99/0.01)$  (approx. 4.6) and p-values less than or equal to 0.01, i.e. those that are considered significant by both tests. Blue coloured points indicated that the computed BF is greater than our threshold, but not significant according to the CMH test. Additionally, dark grey points are significant according to the CMH test, but not to Bait-ER, and light grey points are inferred not significant by both tests.

## 450 References

- 451 Agresti, A. (2003). *Categorical data analysis*, volume 482. John Wiley & Sons.
- 452 Barghi, N., Tobler, R., Nolte, V., Jakšić, A. M., Mallard, F., Otte, K. A., Dolezal, M., Taus, T., Kofler,  
453 R., and Schlötterer, C. (2019). Genetic redundancy fuels polygenic adaptation in *Drosophila*. *PLoS*  
454 *Biol*, 17(2):e3000128.
- 455 Bastide, H., Betancourt, A., Nolte, V., Tobler, R., Stöbe, P., Futschik, A., and Schlötterer, C. (2013).  
456 A genome-wide, fine-scale map of natural pigmentation variation in *drosophila melanogaster*. *PLoS*  
457 *genetics*, 9(6):e1003534.
- 458 Burke, M. K., Liti, G., and Long, A. D. (2014). Standing Genetic Variation Drives Repeatable  
459 Experimental Evolution in Outcrossing Populations of *Saccharomyces cerevisiae*. *Molecular Biology*  
460 *and Evolution*, 31(12):3228–3239.
- 461 Cochran, W. G. (1954). Some Methods for Strengthening the Common  $\chi^2$  Tests. *Biometrics*,  
462 10(4):417.
- 463 Comeron, J. M., Ratnappan, R., and Bailin, S. (2012). The many landscapes of recombination in  
464 *drosophila melanogaster*. *PLoS genetics*, 8(10):e1002905.
- 465 Debelle, A., Courtiol, A., Ritchie, M. G., and Snook, R. R. (2017). Mate choice intensifies motor  
466 signalling in *Drosophila*. *Animal Behaviour*, 133:169–187.
- 467 Foll, M., Shim, H., and Jensen, J. D. (2015). WFABC: a Wright-Fisher ABC-based approach for  
468 inferring effective population sizes and selection coefficients from time-sampled data. *Molecular*  
469 *Ecology Resources*, 15(1):87–98.
- 470 Futschik, A. and Schlötterer, C. (2010). The Next Generation of Molecular Markers From Massively  
471 Parallel Sequencing of Pooled DNA Samples. *Genetics*, 186(1):207–218.
- 472 Godwin, J. L., Vasudeva, R., Michalczyk, Ł., Martin, O. Y., Lumley, A. J., Chapman, T., and Gage, M.  
473 J. G. (2017). Experimental evolution reveals that sperm competition intensity selects for longer,  
474 more costly sperm. *Evolution Letters*, 1(2):102–113.
- 475 Hill, W. G. and Robertson, A. (1966). The effect of linkage on limits to artificial selection. *Genetical*  
476 *Research*, 8(03):269.
- 477 Iranmehr, A., Akbari, A., Schlötterer, C., and Bafna, V. (2017). Clear: Composition of Likelihoods for  
478 Evolve and Resequencing Experiments. *Genetics*, 206(2):1011–1023.
- 479 Jensen, M. A., Charlesworth, B., and Kreitman, M. (2002). Patterns of genetic variation at a  
480 chromosome 4 locus of *Drosophila melanogaster* and *D. simulans*. *Genetics*, 160(2):493–507.
- 481 Jonas, A., Taus, T., Kosiol, C., Schlötterer, C., and Futschik, A. (2016). Estimating the Effective  
482 Population Size from Temporal Allele Frequency Changes in Experimental Evolution. *Genetics*,  
483 204(2):723–735.
- 484 Kawecki, T. J., Lenski, R. E., Ebert, D., Hollis, B., Olivieri, I., and Whitlock, M. C. (2012).  
485 Experimental evolution. *Trends in Ecology & Evolution*, 27(10):547–560.
- 486 Kofler, R., Pandey, R. V., and Schlötterer, C. (2011). PoPoolation2: Identifying differentiation between  
487 populations using sequencing of pooled DNA samples (Pool-Seq). *Bioinformatics*, 27(24):3435–3436.

- 488 Kofler, R. and Schlötterer, C. (2014). A Guide for the Design of Evolve and Resequencing Studies.  
489 *Molecular Biology and Evolution*, 31(2):474–483.
- 490 Papkou, A., Guzella, T., Yang, W., Koepper, S., Pees, B., Schalkowski, R., Barg, M. C., Rosenstiel,  
491 P. C., Teotónio, H., and Schulenburg, H. (2019). The genomic basis of red queen dynamics during  
492 rapid reciprocal hostpathogen coevolution. *Proceedings of the National Academy of Sciences of the*  
493 *United States of America*.
- 494 Schlötterer, C., Kofler, R., Versace, E., Tobler, R., and Franssen, S. U. (2015). Combining  
495 experimental evolution with next-generation sequencing: a powerful tool to study adaptation from  
496 standing genetic variation. *Heredity*, 114(5):431–440.
- 497 Taus, T., Futschik, A., and Schlötterer, C. (2017). Quantifying Selection with Pool-Seq Time Series  
498 Data. *Molecular Biology and Evolution*, 34(11):3023–3034.
- 499 Topa, H., Jónás, Á., Kofler, R., Kosiol, C., and Honkela, A. (2015). Gaussian process test for  
500 high-throughput sequencing time series: Application to experimental evolution. *Bioinformatics*,  
501 31(11):1762–1770.
- 502 Turner, T. L., Stewart, A. D., Fields, A. T., Rice, W. R., and Tarone, A. M. (2011). Population-based  
503 resequencing of experimentally evolved populations reveals the genetic basis of body size variation in  
504 *Drosophila melanogaster*. *PLoS Genetics*, 7(3).
- 505 Vlachos, C., Burny, C., Pelizzola, M., Borges, R., Futschik, A., Kofler, R., and Schlötterer, C. (2019).  
506 Benchmarking software tools for detecting and quantifying selection in evolve and resequencing  
507 studies. *Genome Biology*, 20(1):1–11.
- 508 Vlachos, C. and Kofler, R. (2018). MimicEE2: Genome-wide forward simulations of Evolve and  
509 Resequencing studies. *PLOS Computational Biology*, 14(8):e1006413.
- 510 Wiberg, R. A. W., Gaggiotti, O. E., Morrissey, M. B., and Ritchie, M. G. (2017). Identifying consistent  
511 allele frequency differences in studies of stratified populations. *Methods in Ecology and Evolution*,  
512 2017(February):1–11.
